# Supplementary material
Source: Springer Nature journal article supplement (https://www.springermedizin.de/resource/supplementary/13098_2009_30_MOESM1_ESM.pdf/9670376)

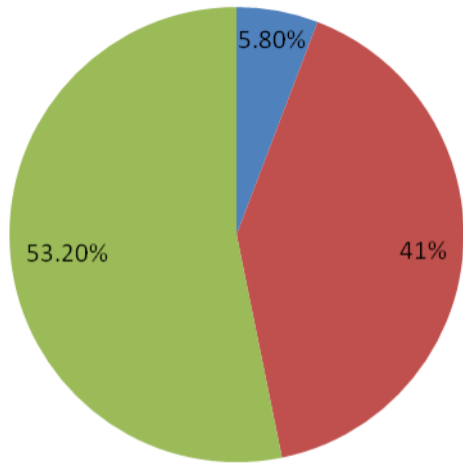

■ 1 ■ 2 ■ 3

Series 1-four components, Series 2-three components, Series 3-two components

Supplement: MOESM1 [file 9670376]
